# Supplementary material for: A Z-scheme photosensitive MOC/g-C3N4 composite catalyst for efficient visible-light driven half and overall water splitting
Source: Royal Society of Chemistry journal article supplement (doi:10.1039/d4ta06849a), 2024-01-01
Supplement: d4ta06849a1.pdf [file d4ta06849a1.pdf]

## SUPPORTING INFORMATION

### A Z-Scheme Photosensitive MOC/g-C<sub>3</sub>N<sub>4</sub> Composite Catalyst for Efficient Visible-Light Driven Half and Overall Water Splitting

*Xin-Ao Li<sup>a†</sup>, Li-Lin Tan<sup>b†</sup>, Xiao-Lin Wang<sup>a</sup>, Yang Liu<sup>a</sup>, Zi-Zhan Liang<sup>a</sup>, Jian-Feng  
Huang<sup>c,\*</sup>, Li-Min Xiao<sup>d</sup>, and Jun-Min Liu<sup>a,\*</sup>*

\*E-mail: [huangjf39@scnu.edu.cn](mailto:huangjf39@scnu.edu.cn); [liujunm@mail.sysu.edu.cn](mailto:liujunm@mail.sysu.edu.cn)

## Table of Contents

|                                                                                                                                                                                                                                                            |     |
|------------------------------------------------------------------------------------------------------------------------------------------------------------------------------------------------------------------------------------------------------------|-----|
| 1. <b>Scheme S1.</b> The synthesis of MOC-Q3.....                                                                                                                                                                                                          | S4  |
| 2. <b>Table S1.</b> Theoretical and actual MOC contents of g-C <sub>3</sub> N <sub>4</sub> /MOC-Q3(7/9/11/13 wt%).....                                                                                                                                     | S6  |
| 3. <b>Table S2.</b> Theoretical and actual IrO <sub>2</sub> contents of IrO <sub>2</sub> (2.04/1.63/1.36 wt%)/g-C <sub>3</sub> N <sub>4</sub> /MOC-Q3.....                                                                                                 | S6  |
| 4. <b>Figure S1.</b> <sup>1</sup> H NMR spectra of A) ligand L-2 and B) MOC-Q3.....                                                                                                                                                                        | S7  |
| 5. <b>Figure S2.</b> <sup>1</sup> H- <sup>1</sup> H COSY spectrum of MOC-Q3.....                                                                                                                                                                           | S7  |
| 6. <b>Figure S3.</b> <sup>1</sup> H DOSY spectrum of MOC-Q3.....                                                                                                                                                                                           | S8  |
| 7. <b>Figure S4.</b> A) Full ESI-MS spectrum, and B-D) ESI-MS spectra of ion peaks for charge states 2 <sup>+</sup> , 3 <sup>+</sup> and 4 <sup>+</sup> of MOC-Q3.....                                                                                     | S8  |
| 8. <b>Table S3.</b> The crystal data of MOC-Q3.....                                                                                                                                                                                                        | S9  |
| 9. <b>Table S4.</b> The bond lengths of MOC-Q3.....                                                                                                                                                                                                        | S9  |
| 10. <b>Table S5.</b> Bond angles of MOC-Q3.....                                                                                                                                                                                                            | S10 |
| 11. <b>Figure S5.</b> A) N <sub>2</sub> adsorption-desorption isotherms and B) pore size distributions of g-C <sub>3</sub> N <sub>4</sub> and g-C <sub>3</sub> N <sub>4</sub> /MOC-Q3.....                                                                 | S11 |
| 12. <b>Table S6.</b> BET surface areas and pore volumes of g-C <sub>3</sub> N <sub>4</sub> and g-C <sub>3</sub> N <sub>4</sub> /MOC-Q3 (11 wt%).....                                                                                                       | S11 |
| 13. <b>Figure S6.</b> FT-IR spectra of MOC-Q3, g-C <sub>3</sub> N <sub>4</sub> , and g-C <sub>3</sub> N <sub>4</sub> /MOC-Q3 (11wt%).....                                                                                                                  | S12 |
| 14. <b>Figure S7.</b> CV curves of A) Ferrocene and B) MOC-Q3 (0.2 mM) in CH <sub>3</sub> CN.....                                                                                                                                                          | S12 |
| 15. <b>Figure S8.</b> Normalized absorption and fluorescence emission spectra of MOC-Q3 in DMSO.....                                                                                                                                                       | S13 |
| 16. <b>Table S7.</b> H <sub>2</sub> production data of g-C <sub>3</sub> N <sub>4</sub> /MOC-Q3 (7/9/11/13 wt%) in 5 h.....                                                                                                                                 | S13 |
| 17. <b>Table S8.</b> Summarized literature data of photocatalytic water splitting by C <sub>3</sub> N <sub>4</sub> -based Z-scheme systems.....                                                                                                            | S14 |
| 18. <b>Table S9.</b> AQY(%) values of g-C <sub>3</sub> N <sub>4</sub> /MOC-Q3 (7/9/11/13 wt%) at different wavelengths.....                                                                                                                                | S20 |
| 19. <b>Figure S9.</b> local potential of g-C <sub>3</sub> N <sub>4</sub> .....                                                                                                                                                                             | S20 |
| 20. <b>Figure S10.</b> local potential of MOC-Q3.....                                                                                                                                                                                                      | S20 |
| 21. <b>Figure S11.</b> local potential of g-C <sub>3</sub> N <sub>4</sub> /MOC-Q3 model.....                                                                                                                                                               | S21 |
| 22. <b>Figure S12.</b> Charge transfer between g-C <sub>3</sub> N <sub>4</sub> /MOC-Q3 model. Yellow region lose electron; cyan region obtain electron. Red frames show charge loss of g-C <sub>3</sub> N <sub>4</sub> due to NO <sub>3</sub> <sup>-</sup> |     |

|                                                                                                                                                                                                                                                                                                 |     |
|-------------------------------------------------------------------------------------------------------------------------------------------------------------------------------------------------------------------------------------------------------------------------------------------------|-----|
| groups.....                                                                                                                                                                                                                                                                                     | S21 |
| 23. <b>Figure S13.</b> Energy levels near Fermi level and their corresponding orbitals of the g-C <sub>3</sub> N <sub>4</sub> /MOC-Q3 model.....                                                                                                                                                | S22 |
| 24. <b>Figure S14.</b> A) SEM and B) TEM images of IrO <sub>2</sub> /g-C <sub>3</sub> N <sub>4</sub> /MOC-Q3, C) PXRD, D) FT-IR spectroscopy, and E) UV-Vis solid absorption spectroscopy of IrO <sub>2</sub> /g-C <sub>3</sub> N <sub>4</sub> /MOC-Q3 before and after long-term reaction..... | S22 |
| 25. <b>Figure S15.</b> The H <sub>2</sub> and O <sub>2</sub> production performances of IrO <sub>2</sub> /g-C <sub>3</sub> N <sub>4</sub> /MOC-Q3 composites prepared at different calcination temperatures.....                                                                                | S23 |
| 26. <b>Figure S16.</b> The H <sub>2</sub> and O <sub>2</sub> production performances of IrO <sub>2</sub> (2.04/1.63/1.36 wt%)/g-C <sub>3</sub> N <sub>4</sub> /MOC-Q3 composites.....                                                                                                           | S23 |
| 27. <b>Reference</b> .....                                                                                                                                                                                                                                                                      | S23 |

## Experimental Section

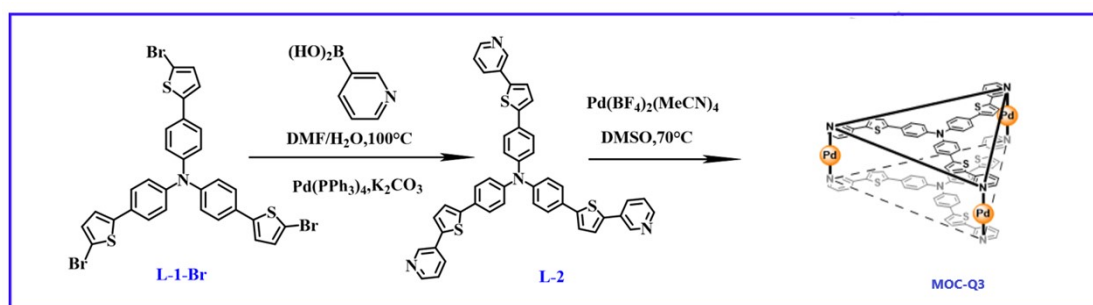

**Scheme S1.** The synthesis of MOC-Q3.

- 1. Synthesis of L-1-Br.** L-1-Br was prepared according to the previous literature.<sup>1</sup>
- 2. Synthesis of L-2.** L-1-Br (2.30 g, 3.30 mmol), Pd(PPh<sub>3</sub>)<sub>4</sub> (0.84 g, 0.73 mmol), and 3-pyridinylboronic acid (2.40 g, 19.80 mmol) were mixed in DMF (100 mL) in Schleck bottle, followed by adding K<sub>2</sub>CO<sub>3</sub> aqueous solution (8 g, 56.1 mmol, 16 mL). The mixture was heated at 100°C for overnight under N<sub>2</sub>, cooled down, filtered and extracted with dichloromethane. The organic extract was treated with aqueous ammonia and deionized water, dried by anhydrous sodium sulfate and filtrated. Silica-gel column chromatography (PE: EtOAc = 1:4 v/v) was used to purify the crude product and a golden solid L-2 of 1.20 g was obtained. Yield: 50.3%. <sup>1</sup>H NMR (400 MHz, DMSO-*d*<sub>6</sub>) δ (ppm): 8.95 (d, *J* = 2.4 Hz, 1H), 8.51 (d, *J* = 4.7 Hz, 1H), 8.12-8.05 (m, 1H), 7.74-7.66 (m, 3H), 7.59-7.52 (m, 1H), 7.47 (dd, *J* = 8.1, 4.8 Hz, 1H), 7.17 (d, *J* = 8.3 Hz, 2H). <sup>13</sup>C NMR (101 MHz, Chloroform-*d*) δ (ppm): 148.34, 146.67, 146.64, 144.62, 138.91, 132.54, 130.37, 128.95, 126.77, 125.23, 124.51, 123.69, 123.62. ESI-Q-TOF: 723.1705, *m/z* ([M+H]<sup>+</sup>). Elemental analysis (C<sub>45</sub>H<sub>30</sub>N<sub>4</sub>S<sub>3</sub>): Theoretical content (C 74.76%, H 4.18%, N 7.75%, S 13.31%); Actual content (C 74.72%, H 4.20%, N 7.80%, S 13.34%).
- 3. Synthesis of IrO<sub>2</sub>·xH<sub>2</sub>O colloid.** K<sub>2</sub>IrCl<sub>6</sub> (120 mg, 0.25 mmol) and disodium hydrogen citrate (200 mg, 0.85 mmol) were mixed in deionized water (200 mL) in a Schleck bottle to give a reddish

brown solution. The pH of the mixture was adjusted to 7.5 by adding 0.25 M NaOH solution. The solution was stirred and heated at 95°C for 30 min, during which time it changed from reddish brown to light green. The pH of the solution was then measured again and adjusted to 7.5, followed by stirring for a further 30 min while maintaining the temperature at 95°C. At this stage the solution turned blue. The above steps were repeated until the pH was stabilized at 7.5, resulting in a dark blue solution. Finally, oxygen was introduced into the solution, which was stirred and heated at 95°C for a further 30 minutes, giving a dark blue colloidal  $\text{IrO}_2 \cdot x\text{H}_2\text{O}$ .

**4. Characterizations.** The steady-state and time-resolved photoluminescence (PL) spectra were tested on an Edinburgh FLSP980 fluorescence spectrometer. The cyclic voltammetry (CV) curves were recorded using a CH Instruments CHI760E electrochemical work station. X-ray photoelectron spectroscopy (XPS) were performed in an ultrahigh vacuum chamber (ESCALAB 250Xi) using an XR6 monochromated  $\text{AlK}\alpha$  X-ray source ( $h\nu = 1486.6$  eV) with a 900 mm spot size. The Pd contents in the samples were determined using inductively coupled plasma-atomic emission spectrometry (ICP-AES) (SPECTRO CIROS VISION, spectra range: 120-800 nm, and holographic grating: 2924 line/mm).

**5. Apparent quantum yield (AQY) measurements for  $\text{H}_2$  evolution.** 20 mg Catalyst, 9 mL water and 1 mL TEOA were added into a sealed quartz bottle. The mixture was ultrasonic-dispersed and degassed by bubbling with  $\text{N}_2$  for 30 min to degass. Then the mixture was stirred and irradiated with a monochromatic LED (Zolix, MLED4-1,  $\lambda = 425$  nm, 450 nm or 515 nm), which photon flux were determined to be  $1083.0 \mu\text{mol h}^{-1}$ ,  $1,146.7 \mu\text{mol h}^{-1}$  and  $1,312.3 \mu\text{mol h}^{-1}$ , respectively. And the  $\text{H}_2$  yields were detected by GC. And the AQYs were calculated as the following formula (1):

$$\Phi = \frac{\text{number of transferred electrons}}{\text{number of incident photons}} \times 100\% = \frac{2 \times n(\text{H}_2)}{n(\text{photons})} \times 100\% \quad (1)$$

**6. Hydroxyl radical trapping experiment.** 20 mg of g-C<sub>3</sub>N<sub>4</sub>, MOC-Q3 or g-C<sub>3</sub>N<sub>4</sub>/MOC-Q3 (11 wt%) was dispersed in a sealed 40 mL quartz bottle containing 10 mL aqueous solution containing 5×10<sup>-4</sup> M terephthalic acid (TA) and 2×10<sup>-3</sup> M NaOH. Then the mixture was stirred and irradiated under a 300 W Xenon lamp with a 420 nm cut-off filter for 1 h. After irradiation, the mixture was filtered using a membrane filter (aqueous phase), and the filtrate was used for fluorescence measurement.

**Table S1.** Theoretical and actual MOC contents of g-C<sub>3</sub>N<sub>4</sub>/MOC-Q3 (7/9/11/13 wt%).

| Sample                                                    | Measured MOC content / wt% |
|-----------------------------------------------------------|----------------------------|
| g-C <sub>3</sub> N <sub>4</sub> /MOC-Q3 (7 wt%)           | 0.18                       |
| g-C <sub>3</sub> N <sub>4</sub> /MOC-Q3 (9 wt%)           | 0.23                       |
| g-C <sub>3</sub> N <sub>4</sub> /MOC-Q3 (11 wt%)          | 0.27                       |
| g-C <sub>3</sub> N <sub>4</sub> /MOC-Q3 (13 wt%)          | 0.33                       |
| IrO <sub>2</sub> /g-C <sub>3</sub> N <sub>4</sub> /MOC-Q3 | 0.26                       |

**Table S2.** Theoretical and actual IrO<sub>2</sub> contents of IrO<sub>2</sub> (2.04/1.63/1.36 wt%)/g-C<sub>3</sub>N<sub>4</sub>/MOC-Q3.

| Sample                                                              | Measured IrO <sub>2</sub> content / wt% |
|---------------------------------------------------------------------|-----------------------------------------|
| IrO <sub>2</sub> (2.04 wt%)/g-C <sub>3</sub> N <sub>4</sub> /MOC-Q3 | 1.76                                    |
| IrO <sub>2</sub> (1.63 wt%)/g-C <sub>3</sub> N <sub>4</sub> /MOC-Q3 | 1.32                                    |
| IrO <sub>2</sub> (1.36 wt%)/g-C <sub>3</sub> N <sub>4</sub> /MOC-Q3 | 1.00                                    |

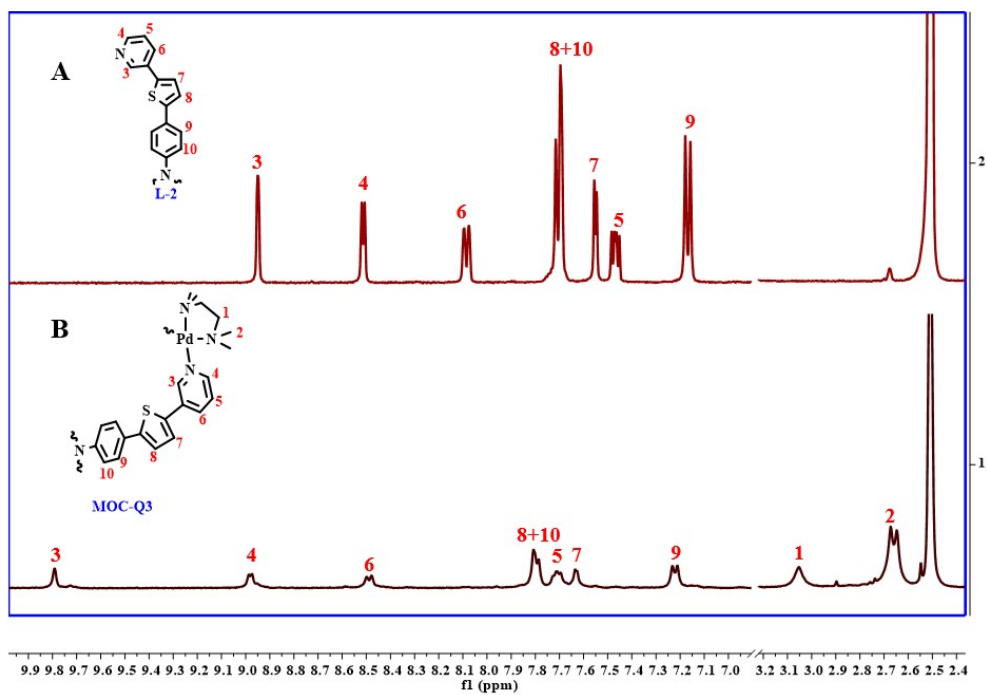

Figure S1.  $^1\text{H}$  NMR spectra (400 MHz,  $\text{DMSO}-d_6$ ) of A) ligand L-2 and B) MOC-Q3.

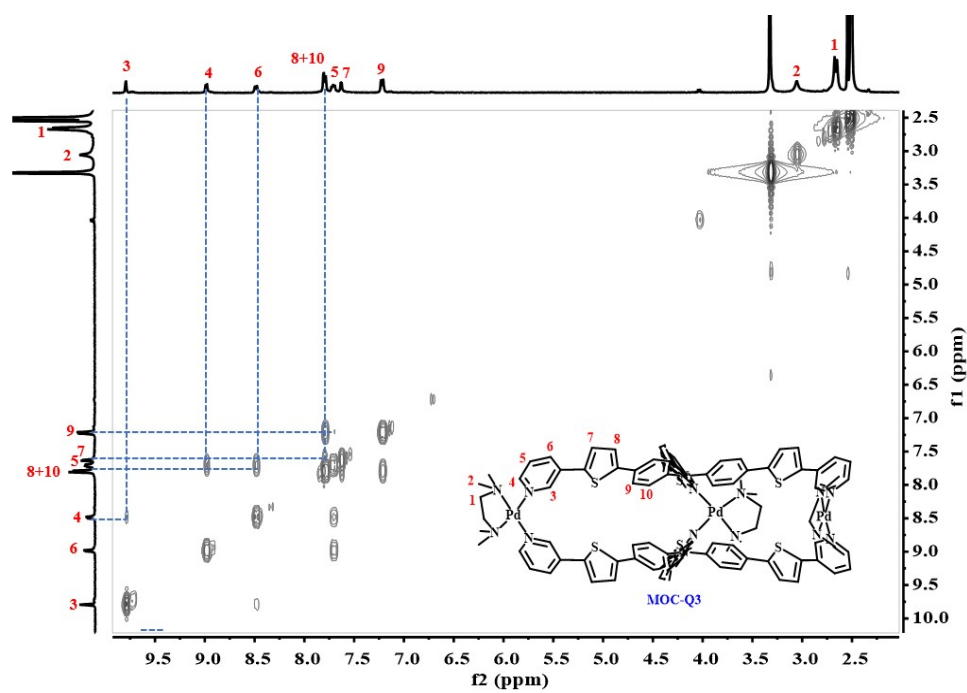

Figure S2.  $^1\text{H}-^1\text{H}$  COSY spectrum (400 MHz,  $\text{DMSO}-d_6$ ) of MOC-Q3.

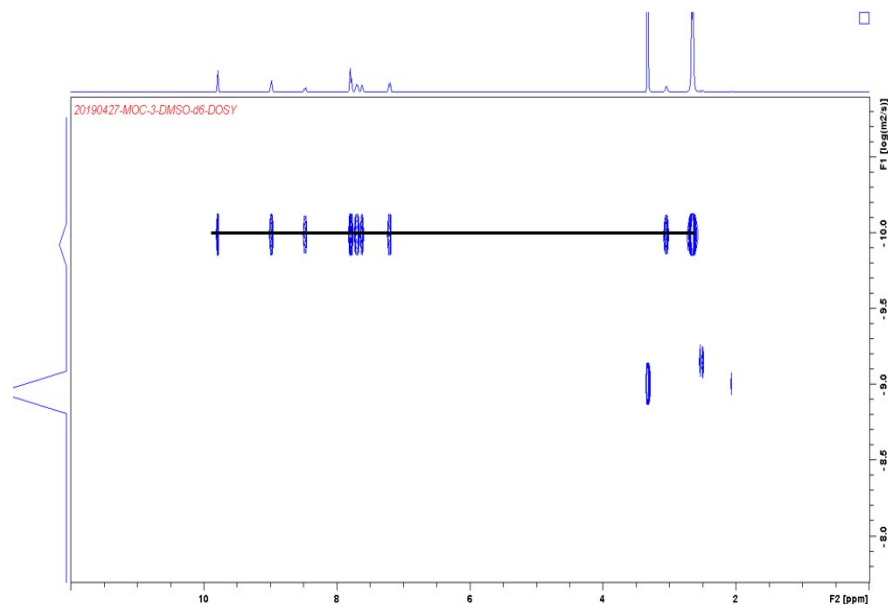

**Figure S3.**  $^1\text{H}$  DOSY spectrum (400 MHz,  $\text{DMSO-}d_6$ ) of MOC-Q3.

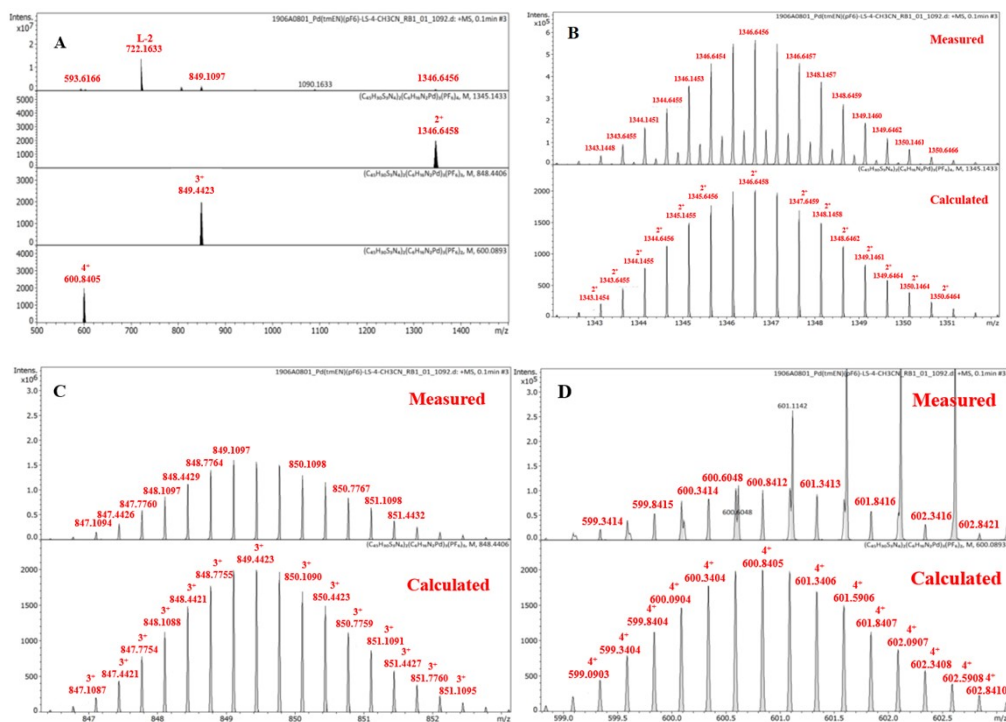

**Figure S4.** A) Full ESI-MS spectrum, and B-D) ESI-MS spectra of ion peaks for charge states  $2^+$ ,  $3^+$  and  $4^+$  of MOC-Q3.



**Table S3.** The crystal data of MOC-Q3.

| MOC-Q3                                      |                                                                                  |
|---------------------------------------------|----------------------------------------------------------------------------------|
| Identification code                         | MOC-Q3                                                                           |
| Empirical formula                           | C <sub>105</sub> H <sub>102</sub> N <sub>14</sub> Pd <sub>3</sub> S <sub>6</sub> |
| Formula weight                              | 2071.56                                                                          |
| Temperature/K                               | 240.00(10)                                                                       |
| Crystal system                              | hexagonal                                                                        |
| Space group                                 | P6 <sub>3</sub> /m                                                               |
| a/Å                                         | 32.1234(11)                                                                      |
| b/Å                                         | 32.1234(11)                                                                      |
| c/Å                                         | 13.3475(5)                                                                       |
| α/°                                         | 90                                                                               |
| β/°                                         | 90                                                                               |
| γ/°                                         | 120                                                                              |
| Volume/Å <sup>3</sup>                       | 11928.2(7)                                                                       |
| Z                                           | 2                                                                                |
| ρ <sub>calc</sub> /g/cm <sup>3</sup>        | 0.577                                                                            |
| μ/mm <sup>-1</sup>                          | 2.471                                                                            |
| F (000)                                     | 2128.0                                                                           |
| Radiation                                   | Cu Kα (λ = 1.54178)                                                              |
| 2θ range for data collection/°              | 7.346 to 81.158                                                                  |
| Index ranges                                | -22 ≤ h ≤ 10, -22 ≤ k ≤ 10, -9 ≤ l ≤ 10                                          |
| Reflections collected                       | 7544                                                                             |
| Independent reflections                     | 2564 [R <sub>in</sub> = 0.0397, R <sub>sigma</sub> = 0.0491]                     |
| Data/restraints/parameters                  | 2564/515/257                                                                     |
| Goodness-of-fit on F <sup>2</sup>           | 0.955                                                                            |
| Final R indexes [I ≥ 2σ (I)]                | R <sub>1</sub> = 0.1348, wR <sub>2</sub> = 0.3490                                |
| Final R indexes [all data]                  | R <sub>1</sub> = 0.1687, wR <sub>2</sub> = 0.3731                                |
| Largest diff. peak/hole / e Å <sup>-3</sup> | 0.77/-0.72                                                                       |

**Table S4.** The bond lengths of MOC-Q3.

| MOC-Q3      |      |           |      |      |           |
|-------------|------|-----------|------|------|-----------|
| Atom        | Atom | Length/Å  | Atom | Atom | Length/Å  |
| Pd1         | N31  | 2.13(2)   | N3   | C16  | 1.489(10) |
| <b>Pd1</b>  | N3   | 2.13(2)   | N1A  | C5A  | 1.39      |
| Pd1         | N1A1 | 2.060(16) | N1A  | C1A  | 1.39      |
| Pd1         | N1A  | 2.060(16) | C5A  | C4A  | 1.39      |
| Pd1         | N1   | 2.075(18) | C4A  | C3A  | 1.39      |
| Pd1         | N11  | 2.075(18) | C4A  | C6A  | 1.464(14) |
| <b>S003</b> | C9A  | 1.812(9)  | C3A  | C2A  | 1.39      |
| S003        | C6A  | 1.823(9)  | C2A  | C1A  | 1.39      |

|             |      |           |     |      |           |
|-------------|------|-----------|-----|------|-----------|
| S003        | C6   | 1.80(2)   | C9A | C8A  | 1.377(9)  |
| <b>S003</b> | C9   | 1.78(2)   | C8A | C7A  | 1.437(9)  |
| <b>N2</b>   | C132 | 1.431(17) | C7A | C6A  | 1.368(9)  |
| <b>N2</b>   | C13  | 1.431(11) | N1  | N11  | 1.73(7)   |
| <b>N2</b>   | C133 | 1.431(16) | N1  | C5   | 1.39      |
| C10         | C11  | 1.39      | N1  | C1   | 1.39      |
| C10         | C15  | 1.39      | C5  | C4   | 1.39      |
| C10         | C9A  | 1.481(14) | C4  | C3   | 1.39      |
| C10         | C9   | 1.49(2)   | C4  | C6   | 1.46(2)   |
| <b>C11</b>  | C12  | 1.39      | C3  | C2   | 1.39      |
| C12         | C13  | 1.39      | C2  | C1   | 1.39      |
| C13         | C14  | 1.39      | C6  | C7   | 1.35(2)   |
| <b>C14</b>  | C15  | 1.39      | C7  | C8   | 1.43(2)   |
| <b>N3</b>   | C17  | 1.500(10) | C8  | C9   | 1.38(2)   |
| <b>N3</b>   | C18  | 1.494(10) | C16 | C161 | 1.478(11) |

<sup>1</sup>+X, +Y, 3/2-Z; <sup>2</sup>1+Y-X, 1-X, +Z; <sup>3</sup>1-Y, +X-Y, +Z

**Table S5.** Bond angles of MOC-Q3.

| MOC-Q3      |      |      |           |      |      |      |           |
|-------------|------|------|-----------|------|------|------|-----------|
| Atom        | Atom | Atom | Angle/°   | Atom | Atom | Atom | Angle/°   |
| N3          | Pd1  | N31  | 78.6(15)  | N1A  | C5A  | C4A  | 120       |
| N1A1        | Pd1  | N3   | 93.3(12)  | C5A  | C4A  | C6A  | 117.8(17) |
| <b>N1A</b>  | Pd1  | N3   | 171.8(11) | C3A  | C4A  | C5A  | 120       |
| N1A         | Pd1  | N31  | 93.3(12)  | C3A  | C4A  | C6A  | 121.9(17) |
| <b>N1A1</b> | Pd1  | N31  | 171.8(11) | C4A  | C3A  | C2A  | 120       |
| N1A1        | Pd1  | N1A  | 94.8(17)  | C1A  | C2A  | C3A  | 120       |
| N1A1        | Pd1  | N11  | 22.8(13)  | C2A  | C1A  | N1A  | 120       |
| N1A         | Pd1  | N11  | 72.0(15)  | C10  | C9A  | S003 | 115.6(11) |
| <b>N11</b>  | Pd1  | N3   | 116.1(13) | C8A  | C9A  | S003 | 110.9(5)  |
| <b>N1</b>   | Pd1  | N3   | 165.2(13) | C8A  | C9A  | C10  | 133.5(12) |
| <b>N11</b>  | Pd1  | N1   | 49(2)     | C9A  | C8A  | C7A  | 114.1(6)  |
| <b>C9A</b>  | S003 | C6A  | 89.7(4)   | C6A  | C7A  | C8A  | 114.4(6)  |
| <b>C9</b>   | S003 | C6   | 92.3(11)  | C4A  | C6A  | S003 | 122.2(14) |
| <b>C132</b> | N2   | C13  | 118.8(11) | C7A  | C6A  | S003 | 110.8(5)  |
| <b>C133</b> | N2   | C13  | 118.8(11) | C7A  | C6A  | C4A  | 126.7(15) |
| <b>C133</b> | N2   | C132 | 118.8(8)  | N11  | N1   | Pd1  | 65.4(11)  |
| <b>C11</b>  | C10  | C15  | 120       | C5   | N1   | Pd1  | 118.0(15) |
| <b>C11</b>  | C10  | C9A  | 115.4(13) | C5   | N1   | N11  | 107.2(14) |
| <b>C11</b>  | C10  | C9   | 113.3(14) | C5   | N1   | C1   | 120       |
| C15         | C10  | C9A  | 122.4(14) | C1   | N1   | Pd1  | 121.2(15) |
| <b>C15</b>  | C10  | C9   | 126.7(14) | C1   | N1   | N11  | 105.0(13) |
| <b>C10</b>  | C11  | C12  | 120       | N1   | C5   | C4   | 120       |
| C13         | C12  | C11  | 120       | C5   | C4   | C3   | 120       |

|            |     |     |           |      |     |      |           |
|------------|-----|-----|-----------|------|-----|------|-----------|
| C12        | C13 | N2  | 121.6(15) | C5   | C4  | C6   | 119(2)    |
| <b>C14</b> | C13 | N2  | 118.4(15) | C3   | C4  | C6   | 119.4(19) |
| <b>C14</b> | C13 | C12 | 120       | C2   | C3  | C4   | 120       |
| C13        | C14 | C15 | 120       | C3   | C2  | C1   | 120       |
| C14        | C15 | C10 | 120       | C2   | C1  | N1   | 120       |
| C17        | N3  | Pd1 | 109.9(15) | C4   | C6  | S003 | 116.9(19) |
| <b>C18</b> | N3  | Pd1 | 107.6(16) | C7   | C6  | S003 | 108.8(16) |
| <b>C18</b> | N3  | C17 | 108.0(9)  | C7   | C6  | C4   | 133(2)    |
| <b>C16</b> | N3  | Pd1 | 116.6(17) | C6   | C7  | C8   | 115(2)    |
| <b>C16</b> | N3  | C17 | 107.1(10) | C9   | C8  | C7   | 114(2)    |
| <b>C16</b> | N3  | C18 | 107.4(10) | C10  | C9  | S003 | 116.9(16) |
| <b>C5A</b> | N1A | Pd1 | 116.5(13) | C8   | C9  | S003 | 108.4(16) |
| <b>C5A</b> | N1A | C1A | 120       | C8   | C9  | C10  | 134(2)    |
| <b>C1A</b> | N1A | Pd1 | 123.2(13) | C161 | C16 | N3   | 114.1(10) |

<sup>1</sup>+X, +Y, 3/2-Z; <sup>2</sup>1+Y-X, 1-X, +Z; <sup>3</sup>1-Y, +X-Y, +Z

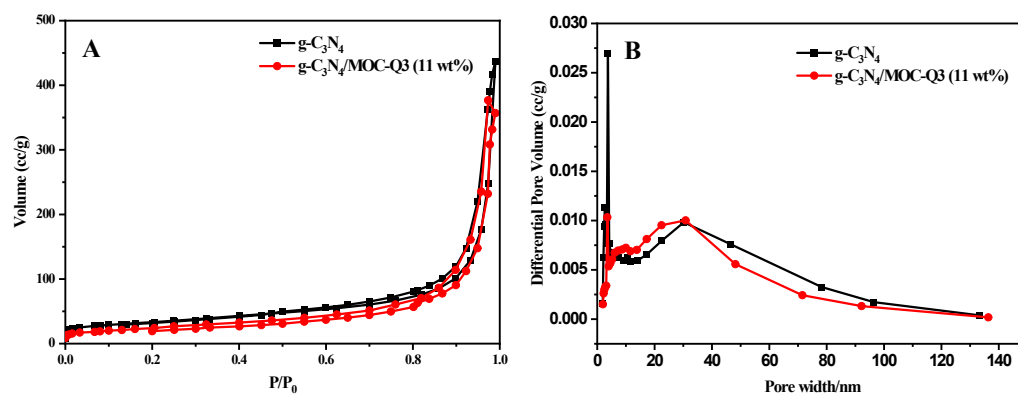

**Figure S5.** A) N<sub>2</sub> adsorption-desorption isotherms and B) pore size distributions of g-C<sub>3</sub>N<sub>4</sub> and g-C<sub>3</sub>N<sub>4</sub>/MOC-Q3.

**Table S6.** BET surface areas and pore volumes of g-C<sub>3</sub>N<sub>4</sub> and g-C<sub>3</sub>N<sub>4</sub>/MOC-Q3 (11 wt%).

|                                                           | g-C <sub>3</sub> N <sub>4</sub> | g-C <sub>3</sub> N <sub>4</sub> /MOC-Q3 (11 wt%) |
|-----------------------------------------------------------|---------------------------------|--------------------------------------------------|
| BET surface area / m <sup>2</sup> g <sup>-1</sup>         | 115.7                           | 81.5                                             |
| Total pore volume / cm <sup>3</sup> g <sup>-1</sup>       | 0.68                            | 0.58                                             |
| Microporous pore volume / cm <sup>3</sup> g <sup>-1</sup> | 0.009                           | —                                                |
| Mesoporous pore volume / cm <sup>3</sup> g <sup>-1</sup>  | 0.68                            | 0.58                                             |

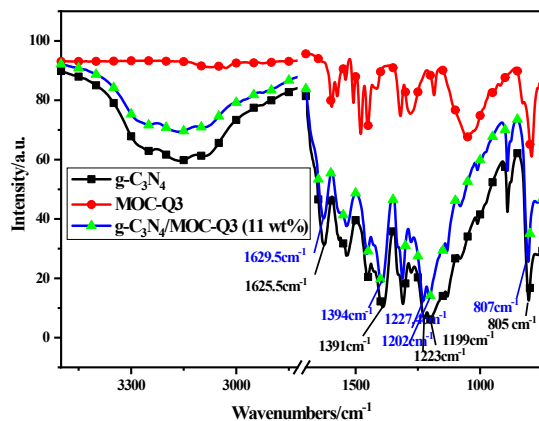

**Figure S6.** FT-IR spectra of MOC-Q3, g-C<sub>3</sub>N<sub>4</sub>, and g-C<sub>3</sub>N<sub>4</sub>/MOC-Q3 (11wt%).

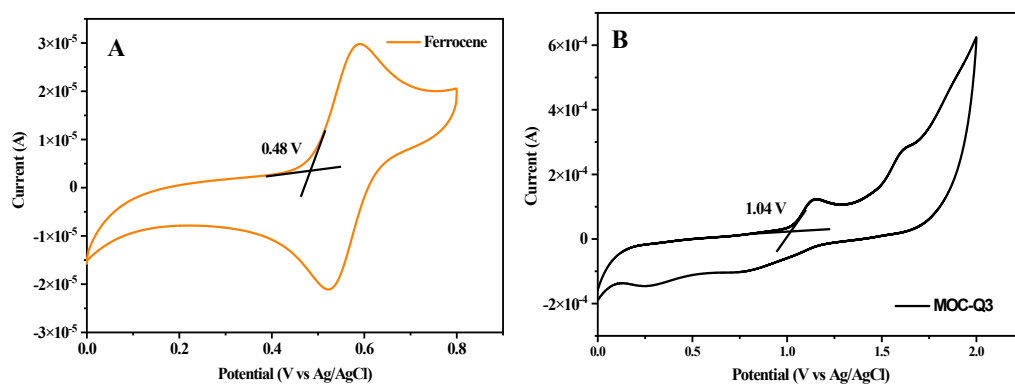

**Figure S7.** CV curves of A) Ferrocene and B) MOC-Q3 (0.2 mM) in CH<sub>3</sub>CN. Room temperature, sweep rates 50 mV s<sup>-1</sup>, Ag/AgCl as reference electrode, graphite rod as counter electrode, platinum wire as working electrode, and 0.1 M tetrabutylammonium hexafluorophosphate (TBAPF<sub>6</sub>) as support electrolyte.

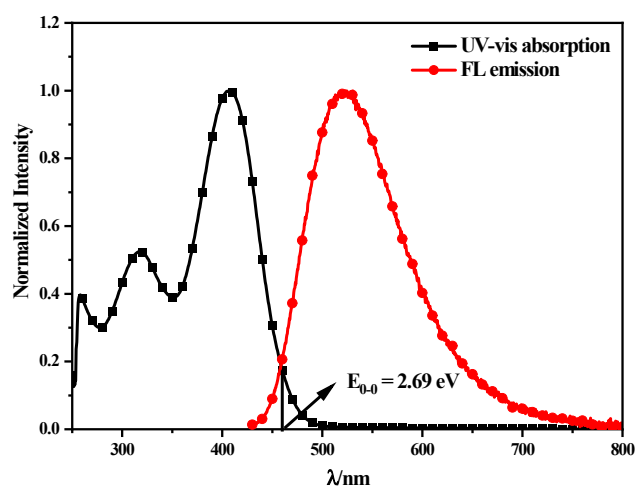

**Figure S8.** Normalized absorption and fluorescence emission spectra of MOC-Q3 in DMSO.

**Table S7.** H<sub>2</sub> production data of g-C<sub>3</sub>N<sub>4</sub>/MOC-Q3 (7/9/11/13 wt%) in 5 h.

| Catalyst                                                                                             | H <sub>2</sub> production                   | H <sub>2</sub> production (5 h) | TON <sub>[Pd]</sub> | TON <sub>[MOC-Q3]</sub> |
|------------------------------------------------------------------------------------------------------|---------------------------------------------|---------------------------------|---------------------|-------------------------|
|                                                                                                      | rate / mmol g <sup>-1</sup> h <sup>-1</sup> | / mmol g <sup>-1</sup>          |                     |                         |
| g-C <sub>3</sub> N <sub>4</sub> /MOC-Q3 (7 wt%)                                                      | 30.3                                        | 151.5                           | 69,834              | 209,502                 |
| g-C <sub>3</sub> N <sub>4</sub> /MOC-Q3 (9 wt%)                                                      | 41.1                                        | 205.5                           | 73,773              | 221,320                 |
| g-C <sub>3</sub> N <sub>4</sub> /MOC-Q3 (11 wt%)                                                     | 50.1                                        | 250.5                           | 76,889              | 230,667                 |
| g-C <sub>3</sub> N <sub>4</sub> /MOC-Q3 (13 wt%)                                                     | 46.3                                        | 231.5                           | 58,165              | 174,494                 |
| Me <sub>4</sub> (en)Pd(NO <sub>3</sub> ) <sub>2</sub> /g-C <sub>3</sub> N <sub>4</sub> /L-2 (11 wt%) | 14.1                                        | 70.5                            | 21,639              | —                       |
| MOC-Q3                                                                                               | 0.084                                       | 0.42                            | 0.42                | 1.25                    |

**Table S8.** Summarized literature data of photocatalytic water splitting by C<sub>3</sub>N<sub>4</sub>-based Z-scheme systems.

| Entry | Catalysts                                                             | Electron mediator   | Mass of catalyst (mg) | Reactant solution                                                   | Cocatalyst | Light source                      | H <sub>2</sub> and O <sub>2</sub> evolution rate / $\mu\text{mol h}^{-1} \text{g}^{-1}$ | AQY              | Reference                                                |
|-------|-----------------------------------------------------------------------|---------------------|-----------------------|---------------------------------------------------------------------|------------|-----------------------------------|-----------------------------------------------------------------------------------------|------------------|----------------------------------------------------------|
| 1     | C <sub>3</sub> N <sub>4</sub> /C-TiO <sub>2</sub>                     | Au                  | 10                    | 10 vol% TEOA aq.                                                    | —          | 300 W Xe lamp (>420 nm)           | 129 and –                                                                               | —                | <i>ChemCatChem</i> <b>2017</b> , 9, 3752-3761            |
| 2     | C <sub>3</sub> N <sub>4</sub> /MoO <sub>3</sub>                       | 1T-MoS <sub>2</sub> | 10                    | 10 vol% TEOA aq.                                                    | 3 wt% Pt   | 300 W Xe lamp (>420 nm)           | 513.0 and –                                                                             | —                | <i>Nanoscale</i> <b>2018</b> , 10, 9292-9303             |
| 3     | C <sub>3</sub> N <sub>4</sub> /CdS                                    | rGO                 | 20                    | H <sub>2</sub> O/lactic acid v/v = 9:1                              | —          | 350 W Xe lamp (IR and UV filters) | 396 and –                                                                               | 36.5%            | <i>Chem. Eng. J.</i> <b>2017</b> , 317, 913-924          |
| 4     | C <sub>3</sub> N <sub>4</sub> /Fe <sub>2</sub> O <sub>3</sub>         | rGO                 | 40                    | H <sub>2</sub> O                                                    | Pt         | 300 W Xe lamp (>300 nm)           | 1,090 and 530                                                                           | —                | <i>Angew. Chem. Int. Ed.</i> <b>2019</b> , 58, 7102-7106 |
| 5     | C <sub>3</sub> N <sub>4</sub> /MOFs                                   | Aromatic rings      | 20                    | 10 vol% TEOA aq.                                                    | 3 wt% Pt   | 300 W Xe lamp (320-780 nm)        | 1123 and –                                                                              | —                | <i>Appl. Catal. B</i> <b>2018</b> , 220, 607-614         |
| 6     | Cd <sub>x</sub> Zn <sub>1-x</sub> S/g-C <sub>3</sub> N <sub>4</sub>   | Au                  | 50                    | 0.1 M glucose aq.                                                   | —          | 300 W Xe lamp (>420 nm)           | 123.21 and –                                                                            | —                | <i>Sci. Bull.</i> <b>2017</b> , 62, 602-609              |
| 7     | Cd <sub>0.5</sub> Zn <sub>0.5</sub> S/g-C <sub>3</sub> N <sub>4</sub> | RGO                 | 30                    | 0.35 M Na <sub>2</sub> S/0.25 M Na <sub>2</sub> SO <sub>3</sub> aq. | —          | 300 W Xe lamp                     | 23,470 and –                                                                            | 37.88% at 420 nm | <i>Appl. Surf. Sci.</i> <b>2018</b> , 447, 783-794       |

|    |                                                                                                  |                  |     |                                          |           |                         |                           |                  |                                                              |
|----|--------------------------------------------------------------------------------------------------|------------------|-----|------------------------------------------|-----------|-------------------------|---------------------------|------------------|--------------------------------------------------------------|
| 8  | Ag <sub>3</sub> PO <sub>4</sub> /g-C <sub>3</sub> N <sub>4</sub>                                 | Ag and graphene  | 300 | AgNO <sub>3</sub> aq. 10 g/L             | —         | 30 W LED                | – and 122                 | —                | <i>Appl. Surf. Sci.</i> <b>2018</b> , 430, 108-115           |
| 9  | Ag <sub>3</sub> PO <sub>4</sub> /g-C <sub>3</sub> N <sub>4</sub>                                 | graphdiyne       | 200 | H <sub>2</sub> O                         | —         | 300 W Xe lamp (>420 nm) | – and 753.1               | —                | <i>Carbon</i> <b>2018</b> , 132, 598-605                     |
| 10 | Ag <sub>3</sub> PO <sub>4</sub> /g-C <sub>3</sub> N <sub>4</sub>                                 | Ag               | 300 | AgNO <sub>3</sub> aq. 10 g/L             | —         | White light LED         | – and 110.1               | —                | <i>Appl. Surf. Sci.</i> <b>2018</b> , 430, 301-308           |
| 11 | C <sub>3</sub> N <sub>4</sub> /Ag <sub>3</sub> PO <sub>4</sub> /Ag <sub>2</sub> MoO <sub>4</sub> | Ag               | 50  | AgNO <sub>3</sub> aq. 10 g/L             | —         | 30 W white LED          | – and 924.6               | —                | <i>Appl. Surf. Sci.</i> <b>2018</b> , 456, 369-378           |
| 12 | g-C <sub>3</sub> N <sub>4</sub> /MoS <sub>2</sub> /Ag <sub>3</sub> PO <sub>4</sub>               | MoS <sub>2</sub> | 300 | AgNO <sub>3</sub> aq. 10 g/L             | —         | White light LED         | – and 232                 | —                | <i>Appl. Surf. Sci.</i> <b>2019</b> , 463, 9-17              |
| 13 | C <sub>3</sub> N <sub>4</sub> /TiO <sub>2</sub>                                                  | None             | 50  | 10 vol% TEOA aq.                         | —         | 350 W Xe lamp           | 4128 and –                | —                | <i>Carbon</i> 2019, <b>149</b> , 618-626                     |
| 14 | C <sub>3</sub> N <sub>4</sub> /OD-ZnO                                                            | None             | 100 | 10 vol% TEOA aq.                         | 1 wt% Pt  | 300 W Xe lamp (>420 nm) | 322 and –                 | —                | <i>Appl. Catal. B</i> <b>2017</b> , 206, 406-416             |
| 15 | C <sub>3</sub> N <sub>4</sub> /WO <sub>3</sub>                                                   | None             | 50  | 10 vol% TEOA aq.                         | 1 wt% Pt  | 300 W Xe lamp           | 3,120 and –               | —                | <i>Appl. Catal. B</i> <b>2017</b> , 219, 693-704             |
| 16 | C <sub>3</sub> N <sub>4</sub> /W <sub>18</sub> O <sub>49</sub>                                   | None             | 50  | 10 vol% TEOA aq.                         | 3 wt% Pt  | 300 W Xe lamp (>420 nm) | 8597 and –                | 39.1% at 420 nm  | <i>Nano Energy</i> <b>2017</b> , 40, 308-316                 |
| 17 | C <sub>3</sub> N <sub>4</sub> /α-Fe <sub>2</sub> O <sub>3</sub>                                  | None             | 100 | 25 vol% TEOA aq.                         | 5 vol% Pt | 300 W Xe lamp (>400 nm) | 776 and –                 | —                | <i>Int. J. Hydrogen Energy</i> <b>2017</b> , 42, 28327-28336 |
| 18 | C <sub>3</sub> N <sub>4</sub> /α-Fe <sub>2</sub> O <sub>3</sub>                                  | None             | 50  | 15 vol% TEOA aq.                         | 1 wt% Pt  | 350 W Xe lamp (>420 nm) | 398 and –                 | —                | <i>Sol. RRL</i> <b>2018</b> , 2, 1800006                     |
| 19 | C <sub>3</sub> N <sub>4</sub> /MnO <sub>2</sub>                                                  | None             | 10  | 10 vol% TEOA aq.                         | 3 wt% Pt  | 300 W Xe lamp (>400 nm) | 28000 and –               | 23.33% at 420 nm | <i>Appl. Catal., B</i> <b>2019</b> , 241, 452-460            |
| 20 | C <sub>3</sub> N <sub>4</sub> /CdS                                                               | None             | 25  | H <sub>2</sub> O Na <sub>2</sub> S (0.05 | 1 wt% Pt  | 300 W Xe lamp (>420 nm) | 60.6 and 28.9 2,276 and – | 10.3% at 420     | <i>ACS Catal.</i> <b>2018</b> , 8, 2209-2217                 |

|    |                                                                       |      |     |                                                                                                              |                                |                                  |             |                   |    |                                                                    |
|----|-----------------------------------------------------------------------|------|-----|--------------------------------------------------------------------------------------------------------------|--------------------------------|----------------------------------|-------------|-------------------|----|--------------------------------------------------------------------|
|    |                                                                       |      |     | M) and<br>Na <sub>2</sub> SO <sub>3</sub><br>(0.1 M) aq.                                                     |                                |                                  |             |                   | nm |                                                                    |
| 21 | C <sub>3</sub> N <sub>4</sub> /PTCDA                                  | None | 100 | 0.1 M<br>AgNO <sub>3</sub> aq.                                                                               | Co <sub>3</sub> O <sub>4</sub> | 300 W Xe lamp (>420 nm)          | - and 847   | 4.5% at<br>420 nm |    | <i>Appl. Catal. B</i> <b>2020</b> , 260, 118179                    |
| 22 | g-C <sub>3</sub> N <sub>4</sub> /WO <sub>3</sub>                      | None | 50  | 10 vol%<br>TEOA aq.                                                                                          | 1 wt% Pt                       | 300 W Xe lamp (>420 nm)          | 400 and –   | —                 |    | <i>Nanotechnology</i> <b>2017</b> , 28, 164002                     |
| 23 | WO <sub>3</sub> /g-C <sub>3</sub> N <sub>4</sub>                      | None | 50  | 15 vol%<br>TEOA aq.                                                                                          | Ni(OH) <sub>x</sub>            | 300 W Xe lamp (>400 nm)          | 576 and –   | —                 |    | <i>Chin. J. Catal.</i> <b>2017</b> , 38, 240-252                   |
| 24 | g-C <sub>3</sub> N <sub>4</sub> /WO <sub>3</sub>                      | None | 50  | 20 vol %<br>lactic acid<br>aq.                                                                               | 2 wt% Pt                       | 350 W Xe lamp (full<br>spectrum) | 982 and –   | —                 |    | <i>Appl. Catal. B</i> <b>2019</b> , 243, 556-565                   |
| 25 | g-C <sub>3</sub> N <sub>4</sub> /TiO <sub>2</sub>                     | None | 100 | 10 vol%<br>TEOA aq.                                                                                          | 0.1 M Pt                       | 300 W Xe lamp (>400 nm)          | 1938 and –  | —                 |    | <i>Appl. Surf. Sci.</i> <b>2018</b> , 448, 288-296                 |
| 26 | MoS <sub>2</sub> /g-C <sub>3</sub> N <sub>4</sub>                     | None | 50  | 25 vol%<br>methanol<br>aq.                                                                                   | 2 wt% Pt                       | 300 W Xe lamp (>420 nm)          | 577 and –   | —                 |    | <i>Appl. Catal. B</i> <b>2018</b> , 228, 64-74                     |
| 27 | CuInS <sub>2</sub> /g-<br>C <sub>3</sub> N <sub>4</sub>               | None | 50  | 10 vol%<br>TEOA,<br>0.25 M<br>Na <sub>2</sub> S, and<br>0.2 M<br>Na <sub>2</sub> SO <sub>3</sub> aq.<br>75mL | —                              | 300 W Xe lamp (>420 nm)          | 1,290 and – | —                 |    | <i>ACS Appl. Mater. Interfaces</i> <b>2017</b> , 9,<br>24577-24583 |
| 28 | g-<br>C <sub>3</sub> N <sub>4</sub> /Ag <sub>2</sub> CrO <sub>4</sub> | None | 50  | water and<br>25mL                                                                                            | 0.6 wt% Pt                     | 300 W Xe lamp (>420 nm)          | 902.1 and – | —                 |    | <i>Sci. Rep.</i> <b>2018</b> , 8, 16504                            |



|    |                                                                       |      |     |                                                                              |                                           |                         |                 |                    |  |                                                    |
|----|-----------------------------------------------------------------------|------|-----|------------------------------------------------------------------------------|-------------------------------------------|-------------------------|-----------------|--------------------|--|----------------------------------------------------|
|    |                                                                       |      |     | methanol<br>(with 10<br>mM<br>NaHCO <sub>3</sub> )                           |                                           |                         |                 |                    |  |                                                    |
| 29 | g-C <sub>3</sub> N <sub>4</sub> /PSi                                  | None | 100 | 10 vol%<br>TEOA aq.                                                          | 3 wt% Pt                                  | 300 W Xe lamp (400 nm)  | 870.5 and –     | —                  |  | <i>J. Catal.</i> <b>2017</b> , 356, 22-31          |
| 30 | g-C <sub>3</sub> N <sub>4</sub> /SiC                                  | None | 50  | 10 vol%<br>TEOA aq.                                                          | 1 wt% Pt                                  | 300 W Xe lamp (>420 nm) | 182 and –       | —                  |  | <i>Appl. Surf. Sci.</i> <b>2017</b> , 391, 449-456 |
| 31 | MnIn <sub>2</sub> S <sub>4</sub> /g-<br>C <sub>3</sub> N <sub>4</sub> | None | 50  | 0.35 M<br>Na <sub>2</sub> S/0.25<br>M Na <sub>2</sub> SO <sub>3</sub><br>aq. | —                                         | 300 W Xe lamp (>400 nm) | 208 and —       | —                  |  | <i>Chem. Eng. J.</i> <b>2019</b> , 359, 244-253    |
| 32 | ZnO/ZnS/g-<br>C <sub>3</sub> N <sub>4</sub>                           | None | 100 | 0.25 M<br>Na <sub>2</sub> S/0.25<br>M Na <sub>2</sub> SO <sub>3</sub><br>aq. | —                                         | 300 W Xe lamp           | 301.25 and –    | —                  |  | <i>Appl. Surf. Sci.</i> <b>2018</b> , 430, 293-300 |
| 33 | Ag <sub>3</sub> PO <sub>4</sub> /g-<br>C <sub>3</sub> N <sub>4</sub>  | None | 300 | H <sub>2</sub> O                                                             | 1 g AgNO <sub>3</sub>                     | 25 W LED                | – and 228.8     | —                  |  | <i>Appl. Catal. B</i> <b>2019</b> , 244, 240-249   |
| 34 | Ag <sub>3</sub> PO <sub>4</sub> /g-<br>C <sub>3</sub> N <sub>4</sub>  | None | 40  | 0.02 M<br>AgNO <sub>3</sub> aq.                                              | —                                         | 300 W Xe lamp (>420 nm) | – and 520       | 20.2% at 420<br>nm |  | <i>Mater. Lett.</i> <b>2017</b> , 201, 66-69       |
| 35 | TiO <sub>2</sub> /g-C <sub>3</sub> N <sub>4</sub>                     | None | 100 | 10 vol%<br>TEOA aq.                                                          | 1 wt% Pt                                  | 150 W Xe lamp           | 1,540 and –     | —                  |  | <i>Appl. Catal. B</i> <b>2016</b> , 191, 130-137   |
|    |                                                                       |      |     | NaI aq. (5<br>mM)                                                            | 1 wt% Pt<br>and 1 wt%<br>PtO <sub>x</sub> |                         | 102.3 and 52.8  | 2.06% at 425<br>nm |  |                                                    |
| 36 | Zn-doped g-                                                           | None | 100 | H <sub>2</sub> O                                                             | 1 wt% Pt                                  | 300 W Xe lamp           | 2,100 and 1,050 | —                  |  | <i>Chin. J. Catal.</i> <b>2018</b> , 39, 472-478   |

|    |                                                                           |      |    |                  |                                       |                         |               |                  |  |                                                            |
|----|---------------------------------------------------------------------------|------|----|------------------|---------------------------------------|-------------------------|---------------|------------------|--|------------------------------------------------------------|
|    | C <sub>3</sub> N <sub>4</sub> /BiVO <sub>4</sub>                          |      |    |                  |                                       |                         |               |                  |  |                                                            |
| 37 | $\alpha$ -Fe <sub>2</sub> O <sub>3</sub> /g-C <sub>3</sub> N <sub>4</sub> | None | 10 | H <sub>2</sub> O | 3 wt% Pt                              | 300 W Xe lamp (>400 nm) | 31400 and –   | 44.35% at 420 nm |  | <i>Adv. Energy Mater.</i> <b>2017</b> , 7, 1700025         |
|    |                                                                           | None | 50 | 10 vol% TEOA aq. | 3 wt% RuO <sub>2</sub>                | 300 W Xe lamp (>400 nm) | 38.2 and 19.1 | —                |  |                                                            |
| 38 | S-g-C <sub>3</sub> N <sub>4</sub> /WO <sub>2.72</sub>                     | None | 50 | 9 vol% TEOA aq.  | —                                     | 300 W Xe lamp (>420 nm) | 786 and –     | 7.6% at 420 nm   |  | <i>Nano Energy</i> <b>2021</b> , 81, 105671                |
| 39 | Py-g-C <sub>3</sub> N <sub>4</sub> tube                                   | None | 20 | 10 vol% TEOA aq. | 1 wt % Pt                             | 300 W Xe lamp (>420 nm) | 4548.4 and –  | 2.16% at 420 nm  |  | <i>Chem. Eng. J.</i> <b>2021</b> , 414, 128802             |
| 40 | g-C <sub>3</sub> N <sub>4</sub> /NCDS                                     | None | 50 | 10 vol% TEOA aq. | MoS <sub>2</sub>                      | 300 W Xe lamp (>420 nm) | 212.41 and –  | —                |  | <i>Appl. Catal. B</i> <b>2019</b> , 247, 124-132           |
| 41 | Ni(OH) <sub>2</sub> /g-C <sub>3</sub> N <sub>4</sub>                      | None | 20 | 20 vol% TEOA aq. | —                                     | 300 W Xe lamp (>420 nm) | 4,360 and –   | 8.2% at 400 nm   |  | <i>Appl. Catal. B</i> <b>2019</b> , 258, 117997            |
| 42 | 3.8-MoCN                                                                  | None | 5  | 20 vol% TEOA aq. | 1 wt % Pt                             | 300 W Xe lamp (>400 nm) | 1265 and –    | 1.64% at 400 nm  |  | <i>Appl. Catal. B: Environ</i> <b>2023</b> , 336, 122907   |
| 43 | M+U-3                                                                     | None | 50 | 10 vol% TEOA aq. | 1 wt % Pt                             | 300 W Xe lamp (>400 nm) | 744 and –     | 21.6% at 400 nm  |  | <i>Appl. Catal. B: Environ.</i> <b>2023</b> , 333, 122805  |
| 44 | CN-C                                                                      | None | 20 | 10 vol% TEOA aq. | 3 wt% Pt                              | 300 W Xe lamp (>420 nm) | 468.8 and –   | 15.56% at 385 nm |  | <i>Chin. J. Catal.</i> <b>2023</b> , 50, 361-371           |
| 45 | CN/CNQDs-20–6 h                                                           | None | 20 | 10 vol% TEOA aq. | 2 wt% Pt                              | 300 W Xe lamp (>420 nm) | 3640.6 and –  | 6.74% at 420 nm  |  | <i>Appl. Catal. B: Environ</i> <b>2023</b> , 339, 123101   |
| 46 | Pt-hCN/Co(OH) <sub>2</sub> -B-hCN                                         | None | 50 | H <sub>2</sub> O | 3 wt%Pt and 3 wt% Co(OH) <sub>2</sub> | 300 W Xe lamp (>320 nm) | 1508 and 760  | 30.1% at 420 nm  |  | <i>ACS Energy Lett.</i> <b>2024</b> , 9, 1915-1922         |
| 47 | HCN                                                                       | None | 50 | 10 vol% TEOA aq. | 3 wt% Pt                              | 300 W Xe lamp (>420 nm) | 7840 and –    | 24.1% at 420 nm  |  | <i>Appl. Catal. B: Environ.</i> <b>2024</b> , 350, 123902. |

|    |                                         |      |    |                  |                  |                         |                 |                 |                                                      |
|----|-----------------------------------------|------|----|------------------|------------------|-------------------------|-----------------|-----------------|------------------------------------------------------|
| 48 | B <sub>1.0</sub> CR <sub>0.5</sub> PCN  | None | 20 | H <sub>2</sub> O | 1 wt % Pt        | 300 W Xe lamp (>420 nm) | 615 and 310     | 2.11% at 420 nm | <i>Chem. Eng. J.</i> <b>2023</b> , 470, 144199       |
| 49 | PCN-SrTiO <sub>3</sub>                  | None | 50 | H <sub>2</sub> O | 3 wt%Pt and CoOx | 300 W Xe lamp (>300 nm) | 202 and 118     | —               | <i>Chin. J. Catal.</i> <b>2023</b> , 48, 279-289     |
| 50 | CoP/CoO@g-C <sub>3</sub> N <sub>4</sub> | None | 50 | H <sub>2</sub> O | CoP and CoO      | 300 W Xe lamp (>420 nm) | 133.2 and 67.2  | 0.92% at 360 nm | <i>Appl. Catal. B: Environ.</i> <b>2024</b> , 124527 |
| 51 | MOC-Q3/g-C <sub>3</sub> N <sub>4</sub>  | None | 5  | 10 vol% TEOA aq. | —                | 300 W Xe lamp (>420 nm) | 50,100 and –    | 31.6% at 425 nm | This work                                            |
|    |                                         |      | 10 | H <sub>2</sub> O |                  |                         | 77.32 and 38.06 |                 |                                                      |

**Table S9.** AQY(%) values of g-C<sub>3</sub>N<sub>4</sub>/MOC-Q3 (7/9/11/13 wt%) at different wavelengths.

| Sample                                           | AQY at 425 nm / % | AQY at 450 nm / % | AQY at 515 nm / % |
|--------------------------------------------------|-------------------|-------------------|-------------------|
| g-C <sub>3</sub> N <sub>4</sub> /MOC-Q3 (7 wt%)  | 16.5              | 9.40              | 0.05              |
| g-C <sub>3</sub> N <sub>4</sub> /MOC-Q3 (9 wt%)  | 21.9              | 10.3              | 0.07              |
| g-C <sub>3</sub> N <sub>4</sub> /MOC-Q3 (11 wt%) | 31.6              | 17.3              | 0.10              |
| g-C <sub>3</sub> N <sub>4</sub> /MOC-Q3 (13 wt%) | 23.5              | 12.2              | 0.08              |

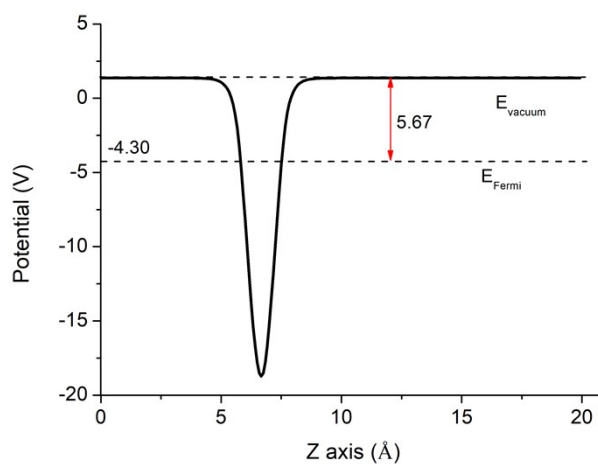

**Figure S9.** Local potential of g-C<sub>3</sub>N<sub>4</sub>.

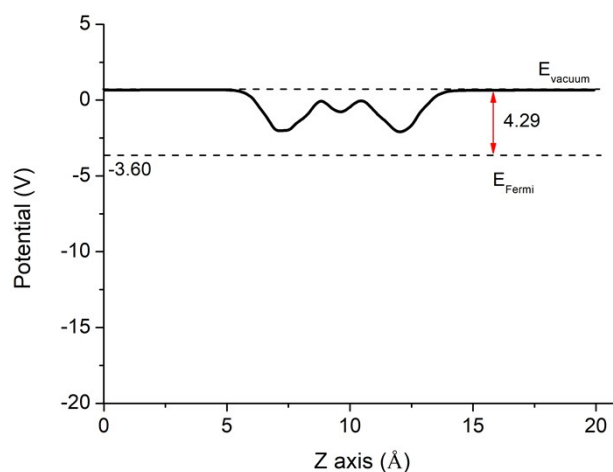

**Figure S10.** local potential of MOC-Q3.

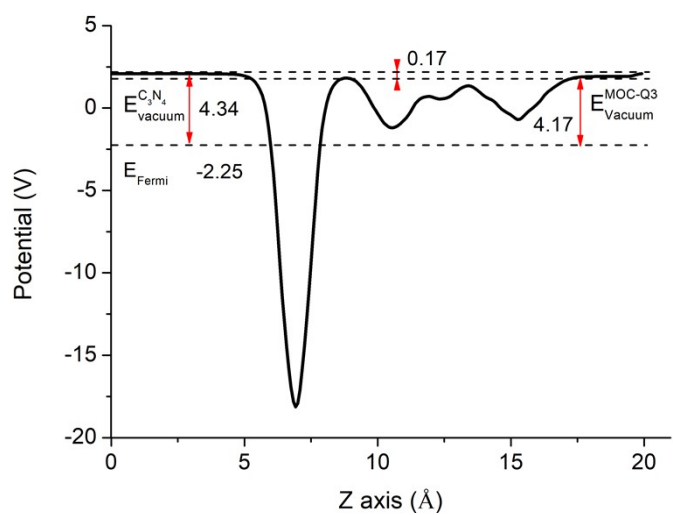

**Figure S11.** Local potential of g-C<sub>3</sub>N<sub>4</sub>/MOC-Q3 model.

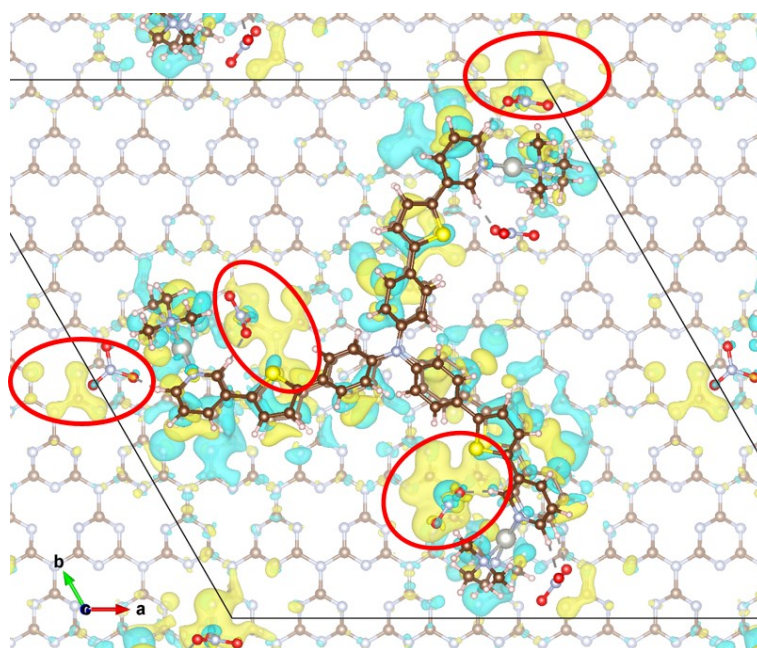

**Figure S12.** Charge transfer between g-C<sub>3</sub>N<sub>4</sub>/MOC-Q3 model. Yellow region lose electron; cyan region obtain electron. Red frames show charge loss of g-C<sub>3</sub>N<sub>4</sub> due to NO<sub>3</sub><sup>-</sup> groups.

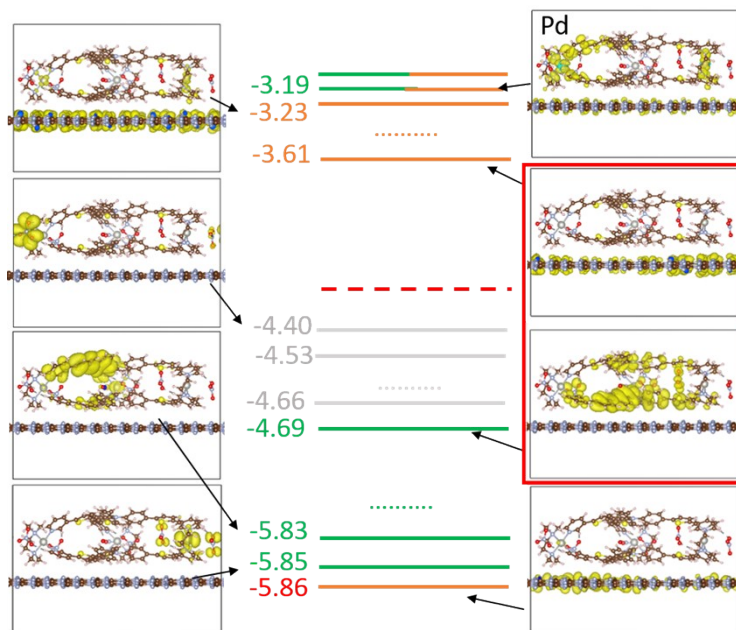

**Figure S13.** Energy levels near Fermi level and their corresponding orbitals of the  $g\text{-C}_3\text{N}_4/\text{MOC-Q3}$  model.

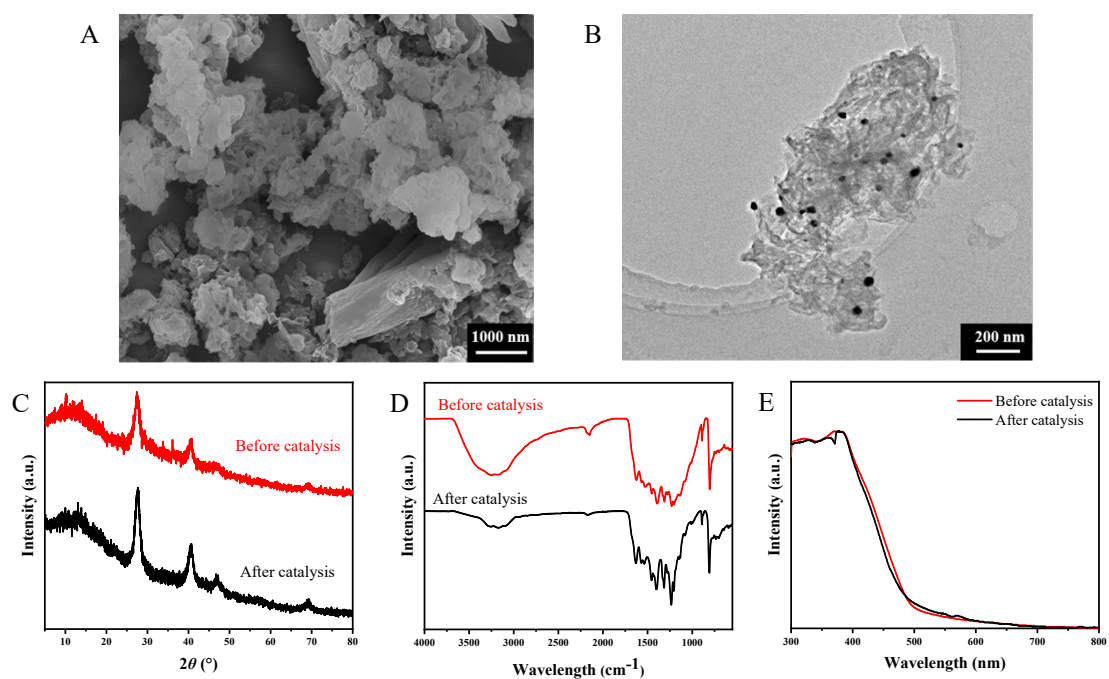

**Figure S14.** A) SEM and B) TEM images of  $\text{IrO}_2/g\text{-C}_3\text{N}_4/\text{MOC-Q3}$ , C) PXRD, D) FT-IR spectroscopy, and E) UV-Vis solid absorption spectroscopy of  $\text{IrO}_2/g\text{-C}_3\text{N}_4/\text{MOC-Q3}$  before and after long-term reaction.

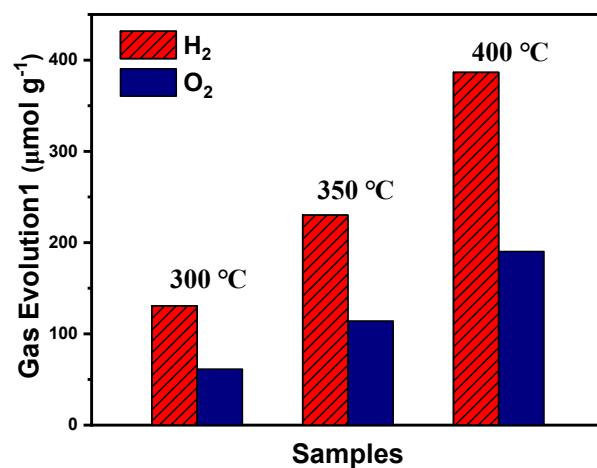

**Figure S15.** The H<sub>2</sub> and O<sub>2</sub> production performances of IrO<sub>2</sub>/g-C<sub>3</sub>N<sub>4</sub>/MOC-Q3 composites prepared at different calcination temperatures.

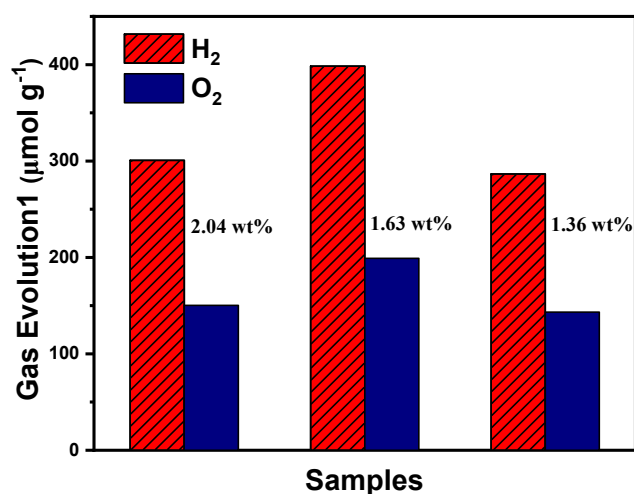

**Figure S16.** The H<sub>2</sub> and O<sub>2</sub> production performances of IrO<sub>2</sub> (2.04/1.63/1.36 wt%)/g-C<sub>3</sub>N<sub>4</sub>/MOC-Q3 composites.

## Reference

1. T.-T. Bui, L. Beouch, X. Sallenave, F. Goubard, Carbazol-N-yl and Diphenylamino End-Capped Triphenylamine-based Molecular Glasses: Synthesis, Thermal, and Optical Properties. *Tetrahedron Lett.* **2013**, *54*, 4277-4280. DOI: 10.1016/j.tetlet.2013.05.152
